# Supplementary material for: Combining Costs and Benefits of Animal Activities to Assess Net Yield Outcomes in Apple Orchards
Source: PLoS One. 2016 Jul 8;11(7):e0158618. doi: 10.1371/journal.pone.0158618 (PMC4938594; doi:10.1371/journal.pone.0158618)
Supplement: S1 File — (XLSX) [file pone.0158618.s002.xlsx]

## Sheet: Yield parameters
Site	Excl_FruitSet	Open_FruitSet	Open_Yloss	Excl_Yloss	Excl_Outcome	Open_Outcome	Cultivar
SL1	0.1	0.0125	0	0	0.1	0.00833333	PL
SL2	0.0869565	0.039604	0	0	0.0724638	0.029703	PL
SL3	0.292929	0.211921	0.1	0.0740741	0.252525	0.178808	PL
SL4	0.132353	0.259259	0.142857	0	0.102941	0.222222	PL
SL5	0.04	0.0934579	0	0	0.04	0.0934579	PL
SL6	0.0869565	0.0208333	0	0	0.0797101	0.0138889	PL
SL7	0.0789474	0.0495868	0	0	0.0789474	0.0454545	PL
SL8	0.137097	0.0503145	0	0	0.120968	0.0440252	PL
SL9	0.0172414	0.0444444	0	0	0	0.0333333	PL
SL10	0.125874	0.054878	0	0.0714286	0.0909091	0.0365854	PL
SG1	0.141176	0.378378	0.191489	0.285714	0.0588235	0.256757	Granny
SG2	0.108108	0.075188	0	0.375	0.045045	0.0526316	Granny
SG3	0.148649	0.252252	0	0.3	0.0945946	0.0810811	GD
SG4	0.132867	0.285714	0.16	0.294118	0.0839161	0.157895	GD
SG5	0.235294	0.141732	0.0833333	0.315789	0.152941	0.0866142	GD
SG6	0.0862069	0.288288	0.142857	0.2	0.0689655	0.216216	Granny
SG7	0.113208	0.178218	0.0666667	0.0909091	0.0943396	0.138614	GD
SG8	0.0942029	0.165354	0.0555556	0.363636	0.0507246	0.133858	GD
SG9	0.108108	0.0810811	0.25	0.333333	0.0540541	0.0540541	Granny
SG10	0.153153	0.179487	0.133333	0.571429	0.0540541	0.111111	GD
HM1	0.188406	0.37931	0	0.153846	0.15942	0.137931	Grav
HM2	0.120301	0.149758	0	0.0833333	0.0827068	0.0772947	Cox
HM3	0.114754	0.0611111	0	0.2	0.0327869	0.0111111	Gala
HM4	0.162162	0.20398	0	0.4	0.0540541	0	Gala
HM5	0.103774	0.207547	0	0	0.0943396	0.188679	Gala
HM6	0.0555556	0.078125	0	0	0.0555556	0.0625	PL
HM7	0.0754717	0.415094	0	0	0.0754717	0.0377358	PL
HM8	0.26087	0.5	0	0	0.231884	0.275862	PL
HM9	0.168317	0.22973	0	0.384615	0.0792079	0.162162	Granny
HM10	0.1875	0.0941176	0	0.181818	0.140625	0.0235294	GD
HL1	0.366337	0.377622	0.0263158	0.15625	0.267327	0.258741	PL
HL2	0.333333	0.391304	0.0434783	0	0.333333	0.15942	PL
HL3	0.0714286	0.0225564	0	0	0.0714286	0.0075188	PL
HL4	0.163934	0.207317	0.0833333	0	0.163934	0.134146	PL
HL5	0.166667	0.448276	0.0666667	0.25	0.0714286	0.241379	Granny
HL6	0.188034	0.378378	0	0	0.188034	0.108108	Granny
HL7	0.375	0.328125	0	0	0.34375	0.21875	SD
HL8	0.144928	0.452381	0	0	0.130435	0.452381	SD
HL9	0.189189	0.188976	0	0	0.189189	0.188976	SD
HL10	0.133858	0.471698	0	0	0.133858	0.235849	SD
BM1	0.196721	0.432432	0	0.0833333	0.180328	0.391892	Gala
BM2	0.111111	0.15942	0.0909091	0.111111	0.0987654	0.144928	Gala
BM3	0.101449	0.115789	0	0.142857	0.0869565	0.115789	Gala
BM4	0.169811	0.201299	0	0.117647	0.141509	0.194805	Gala
BM5	0.188889	0.261261	0	0.125	0.155556	0.198198	Gala
BM6	0.224138	0.129412	0	0	0.172414	0.117647	Gala
BM7	0.0792079	0.133333	0	0	0.0594059	0.133333	Gala
BM8	0.2	0.257426	0.0833333	0	0.189474	0.217822	Gala
BM9	0.129412	0.148515	0	1	0	0.138614	Gala
BM10	0.166667	0.2	0	0.0833333	0.122222	0.2	Gala
BW1	0.120879	0.0731707	0	0.181818	0.0989011	0.0609756	Gala
BW2	0.118519	0.0704225	0	0.1875	0.0962963	0.056338	Gala
BW3	0.171429	0.0606061	0	0.2	0.114286	0.0454545	Gala
BW4	0.0344828	0.0202703	0.5	1	0	0.00675676	Gala
BW5	0	0.0434783	0.166667	0	0	0.0362319	Gala
BW6	0.0440252	0.0941176	0	0	0.0440252	0.0588235	Gala
BW7	0.109375	0.081761	0	0	0.109375	0.0691824	Gala
BW8	0.127778	0.121951	0.05	0.0869565	0.116667	0.115854	Gala
BW9	0.189655	0.1125	0	0	0.172414	0.075	Gala
BW10	0.108108	0.0875	0	0	0.108108	0.075	Gala

## Sheet: Arthropod community
Site	Leaf/Stem	Bud/Fruit	Pollen/Nectar	Insects	Pollen+Insect	P:B Ratio
SL1	0.214286	0.571429	0	0.214286	0	3.66667
SL2	0.285714	0.428571	0	0.142857	0.142857	2.5
SL3	0.5	0.272727	0.0909091	0	0.136364	3.4
SL4	0.421053	0.263158	0	0.236842	0.0789474	2.16667
SL5	0	0.5	0.125	0.25	0.125	1
SL6	0.481481	0.333333	0.148148	0.037037	0	4.4
SL7	0.652174	0	0.130435	0.0869565	0.130435	1.875
SL8	0.0769231	0.230769	0.230769	0.230769	0.230769	0.444444
SL9	0.333333	0.333333	0.142857	0.142857	0.047619	2
SL10	0.166667	0.0833333	0.25	0.0833333	0.416667	0.333333
SG1	0.117647	0.558824	0.0294118	0.147059	0.147059	2.09091
SG2	0.108108	0.540541	0.0810811	0.216216	0.0540541	1.84615
SG3	0	0.767442	0	0.139535	0.0930233	3.3
SG4	0.0666667	0.566667	0.0666667	0.15	0.15	1.72727
SG5	0.0294118	0.617647	0.0294118	0.205882	0.117647	1.83333
SG6	0.133333	0.55	0.0333333	0.25	0.0333333	2.15789
SG7	0	0.659091	0.0681818	0.204545	0.0681818	1.93333
SG8	0.0350877	0.561404	0.0175439	0.0701754	0.315789	1.47826
SG9	0.08	0.68	0.04	0.12	0.08	3.16667
SG10	0.075	0.6	0	0.2	0.125	2.07692
HM1	0	0.66	0.1	0.14	0.1	1.94118
HM2	0.0285714	0.642857	0.0571429	0.242857	0.0285714	2.04348
HM3	0.0789474	0.5	0.131579	0.236842	0.0526316	1.375
HM4	0.0277778	0.513889	0.0833333	0.222222	0.152778	1.18182
HM5	0.0597015	0.701493	0.0149254	0.0746269	0.149254	3.1875
HM6	0.0681818	0.318182	0.113636	0.204545	0.295455	0.62963
HM7	0.0588235	0.176471	0.147059	0.441176	0.176471	0.307692
HM8	0.0333333	0.45	0.133333	0.2	0.183333	0.935484
HM9	0.0227273	0.454545	0.0681818	0.204545	0.25	0.913043
HM10	0.0483871	0.16129	0.0806452	0.0967742	0.612903	0.265306
HL1	0.0526316	0.105263	0	0.368421	0.473684	0.1875
HL2	0	0	0.210526	0.421053	0.368421	0
HL3	0.05	0	0.1	0.7	0.15	0.0526316
HL4	0	0.421053	0.105263	0.368421	0.105263	0.727273
HL5	0.0555556	0	0	0.555556	0.388889	0.0588235
HL6	0	0.131579	0.263158	0.578947	0.0263158	0.151515
HL7	0.047619	0	0.142857	0.285714	0.52381	0.05
HL8	0	0	0	0.583333	0.416667	0
HL9	0	0.0909091	0.0454545	0.454545	0.409091	0.1
HL10	0	0	0.382353	0.411765	0.205882	0
BM1	0	0.0441176	0.147059	0.176471	0.632353	0.0461538
BM2	0.0465116	0.0697674	0.0930233	0.465116	0.325581	0.131579
BM3	0.0123457	0.0246914	0.0740741	0.530864	0.358025	0.0384615
BM4	0.0444444	0.0444444	0.0444444	0.377778	0.488889	0.097561
BM5	0	0.0298507	0.149254	0.19403	0.626866	0.0307692
BM6	0.0192308	0.0769231	0.192308	0.307692	0.403846	0.106383
BM7	0.0392157	0	0.137255	0.215686	0.607843	0.0408163
BM8	0.0714286	0.0892857	0.0714286	0.375	0.392857	0.191489
BM9	0.0144928	0.15942	0.0289855	0.289855	0.507246	0.210526
BM10	0.030303	0.030303	0.242424	0.30303	0.393939	0.0645161
BW1	0.212121	0	0.333333	0.393939	0.0606061	0.269231
BW2	0.0333333	0	0.133333	0.633333	0.2	0.0344828
BW3	0.0357143	0.0714286	0.0714286	0.5	0.321429	0.12
BW4	0.0714286	0.0178571	0.0178571	0.464286	0.428571	0.0980392
BW5	0.0851064	0	0.0425532	0.510638	0.361702	0.0930233
BW6	0.0606061	0	0.151515	0.636364	0.151515	0.0645161
BW7	0.0689655	0.103448	0.0689655	0.586207	0.172414	0.208333
BW8	0.0322581	0	0.0645161	0.709677	0.193548	0.0333333
BW9	0.0434783	0	0.173913	0.478261	0.304348	0.0454545
BW10	0.125	0.0833333	0.0416667	0.458333	0.291667	0.263158

## Sheet: CWMs per orchard
Saunders & Luck: Combining costs and benefits of animal activities to assess net yield outcomes in apple orchards
Average CWM values per orchard
	HM	SG	BM	BW	HL	SL
Leaves/Stems	0.0426451	0.0645255	0.0277973	0.0768012	0.0205806	0.313163
Buds/Fruit	0.457873	0.610161	0.0568804	0.0276067	0.0748804	0.301665
Pollen/Nectar	0.0929836	0.036563	0.118026	0.109908	0.124961	0.111812
Insects	0.206359	0.170341	0.323552	0.537104	0.472776	0.142494
Pollen+insects	0.20014	0.118409	0.473745	0.24858	0.306802	0.130866

## Sheet: Metadata
Saunders & Luck: Combining costs and benefits of animal activities to assess net yield outcomes in apple orchards
Signifier	Meaning
Orchard	Orchard Name
	SL = Shepparton 1
	SG = Shepparton 2
	HM = Harcourt 1
	HL = Harcourt 2
	BM = Batlow 1
	BW = Batlow 2
Excl_FruitSet	Initial number of fruitlets set as prpn of number of blossoms on exclusion branches
Open_FruitSet	Initial number of fruitlets set as prpn of number of blossoms on open branches
Open_Yloss	Proportion of pre-harvest fruit with major insect damage on open branches
Excl_Yloss	Proportion of pre-harvest fruit with major insect damage on exclusion branches
Excl_Outcome	Net yield outcome on exclusion branches (proportion of blossoms that resulted in undamaged fruit)
Open_Outcome	Net yield outcome on open branches (proportion of blossoms that resulted in undamaged fruit)
Leaf/Stem	Community-weighted mean abundance of leaf/stem sucking arthropods
Bud/Fruit	Community-weighted mean abundance of bud/fruit sucking arthropods
Pollen/Nectar	Community-weighted mean abundance of pollen/nectar feeding arthropods
Insects	Community-weighted mean abundance of insect predator arthropods
Pollen+Insect	Community-weighted mean abundance of pollen+insect feeding arthropods
P:B Ratio	Ratio of pest arthropod abundance to beneficial arthropod abundance
