# Supplementary material for: Combining Costs and Benefits of Animal Activities to Assess Net Yield Outcomes in Apple Orchards
Source: PLOS journal article supplement (doi:10.1371/journal.pone.0158618), 2016-07-08
Supplement: S4 (10.1371/journal.pone.0158618.s004) [file journal.pone.0158618.s004]

Table S2 Arthropod taxa in each feeding trait group. Arthropods were grouped by their main effect on apple crop production as a result of their known activity in Australian apple orchards (State of New South Wales 2009).

| <b>Leaf/stem suckers</b>                  | <b>Bud/fruit suckers</b>             | <b>Pollen/nectar only</b>          | <b>Insect prey only</b>                                                       | <b>Pollen/nectar + insect prey</b>      |
|-------------------------------------------|--------------------------------------|------------------------------------|-------------------------------------------------------------------------------|-----------------------------------------|
| Planthoppers (Hemiptera: Auchenorrhyncha) | Thrips (Thysanoptera)                | Native bees (Hymenoptera: Apoidea) | Parasitoid wasps (Hymenoptera: Parasitica; Chrysidoidea)                      | Hoverflies (Diptera: Syrphidae)         |
| Aphids (Hemiptera: Aphididae)             | Pest moths (Lepidoptera)             |                                    | Spiders (Aranae)                                                              | Vespid wasps (Hymenoptera: Vespoidea)   |
|                                           | True bugs (Hemiptera: Heteroptera)   |                                    | Lacewings (Neuroptera)                                                        | Calyptrate flies (Diptera: Calyptratae) |
|                                           | Weevils (Coleoptera: Curculionoidea) |                                    | Predatory & parasitic flies (Diptera: Stratiomyiidae; Asilidae; Pipunculidae) |                                         |
|                                           |                                      |                                    | Predatory beetles (Coleoptera: Coccinellidae)                                 |                                         |
|                                           |                                      |                                    | Earwigs (Dermaptera)                                                          |                                         |

Reference: State of New South Wales (2009) Integrated Pest Management for Australian Apples and Pears. Department of Industry and Investment. Available online: <http://www.dpi.nsw.gov.au/agriculture/horticulture/pomes/ipm-apples-pears>
